# Supplementary material for: Vascular Ehlers-Danlos Syndrome: A Comprehensive Natural History Study in a Dutch National Cohort of 142 Patients
Source: PubMed Central journal article supplement (PMC11188628; doi:10.1161/circgen.122.003978), 2024-04-16
Supplement: hcg-17-e003978-s001.pdf [file hcg-17-e003978-s001.pdf]

## SUPPLEMENTAL MATERIAL

### Supplemental Methods

#### Study population

Index patients and relatives (both children and adults) with a P/LP *COL3A1* variant or copy number variation (CNV) from eight academic clinical genetic centres in the Netherlands were included (Supplementary table 1). Children with an affected first degree relative were considered eligible for genetic testing for the familial *COL3A1* variant. There is no age restriction for presymptomatic genetic testing for vEDS in the Netherlands. However, there is a reluctance for presymptomatic genetic testing for vEDS in Dutch parents and healthcare providers, causing low numbers of children to be diagnosed with vEDS. The reluctance is due to potential insurance issues, the unclear benefits of establishing the diagnosis in childhood and vascular screening is generally not performed in young children.

Retrospective collection and detailed analysis of molecular and clinical data was performed. Cross-sectional assessment of enrolled patients with a onetime visit at the outpatient clinic was performed between 2019 and 2021 to complete the clinical data and systematically chart the phenotype of index patients and, if available, first/second degree affected family members carrying the familial *COL3A1* variant. All data were entered in a pseudo-anonymized database available only for the researchers.

#### Measurements of clinical features

Absolute aortic diameters of  $\geq 40$  mm for the thoracic aorta and  $\geq 30$  mm for the abdominal aorta were classified as an aortic aneurysm<sup>34,46</sup>. An arterial aneurysm of a middle sized artery was defined as a 50% increase in the normal diameter of the vessel<sup>47</sup>. The z-score of a Sinus of Valsalva aneurysm was calculated with a web-based calculation tool on the Marfan foundation site (<https://marfan.org/dx/z-score-adults/>), that uses the normograms of Devereux et al<sup>48</sup> and the method of Dubois and Dubois<sup>49</sup> to calculate the BSA. Hypertension was defined as a blood pressure above 90/140 mm Hg and/or the need for antihypertensive drugs<sup>50</sup>. Individuals without hypertension who preventively received an antihypertensive drug because of the diagnosis vEDS were defined as no hypertension. Major events were defined as death due to complications of vEDS, arterial aneurysm or dissection, bowel rupture, other organ rupture, spontaneous pneumothorax or stroke.

Suggestive features of vEDS upon physical examination were considered: prominent (sunken) eyes, narrow nose, gingival recession/fragility, lobeless ears, acrogeria, easy bruising, translucent skin, early onset varicose veins (<30 years of age and nulliparous if female) and clubfeet. An appearance highly suggestive for vEDS was defined as the presence of five or more of these suggestive features

(Supplementary table 2). Clinical illustrations of the above mentioned features are available on <https://elementsofmorphology.nih.gov/>.

### **Variant analysis**

The pathogenicity of variants in the *COL3A1* gene (NM\_000090.3, NG\_007404.1) was assessed using Alamut (Alamut Visual Plus, version 1.5.1, 2021 Sophia Genetics), integrating data from large-scale population genetic studies, evolutionary conservation of nucleotides and amino acids, *in silico* missense and mRNA splicing prediction tools. *COL3A1* variants with a minor allele frequency (MAF) > 1% in the Genome Aggregation Database were excluded from further analysis. If possible, co-segregation of variants with the disease phenotype was analyzed. Variants were interpreted according to the 2015 American College of Medical Genetics and Genomics/Association of Molecular Pathology (ACMG/AMP) guidelines<sup>51</sup>. Only variants classified as P/LP were included in this study. In the case of splice variants, if fibroblasts were available, RNA sequencing was performed to investigate the effect on splicing. Nonsense variants and frameshift variants were classified as most likely leading to haploinsufficiency. The first quarter of the collagen helical domain of the *COL3A1* gene was defined as the first ten exons of this domain.

### **Statistical analysis**

Because of small patient numbers much of the data has a skewed distribution. Continuous variables were summarized by median and interquartile range. Categorical data are expressed in frequencies and percentages. Continuous data were compared using the Wilcoxon Mann-Whitney U test or the Kruskal-Wallis tests. Comparisons in categorical data were made using the chi-square test or Fisher exact test. To prevent bias from dependent data, only one member (if available the index patient) per family was included in the analysis of the associations between major events and location of the variant in *COL3A1*. Comparisons of major events and the location of the variants in *COL3A1* were made for all major events separately. Associations of time until the first major event were examined using a Kaplan-Meier curve. Because early major events weigh more heavily than major events at older age, the Gehan-Breslow-Wilcoxon test was used to assess the significance. All tests are 2-sided and significance was assumed at p-value < 0.05. Variables with a p-value < 0.05 in univariate analysis were eligible for the binary logistic regression model. Odd ratios, confidence intervals and p-values were used for interpretation. Statistical analysis was performed using SPSS software version 22 (IBM Corp. Released 2013. IBM SPSS Statistics for Windows, Version 22.0. Armonk, NY, USA).

**Supplemental Table 1. Inclusion procedure**

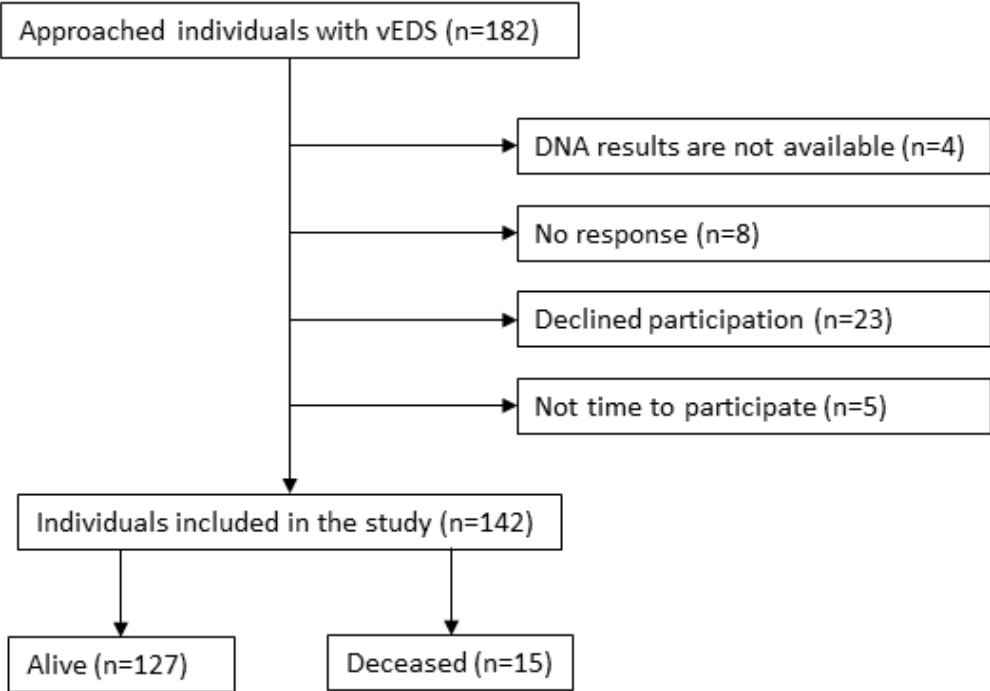

**Supplemental Table 2. Criteria for an appearance highly suggestive for vEDS**

| <b>Feature</b>                                                          | <b>Yes = 1 points/ no = 0 points</b> |
|-------------------------------------------------------------------------|--------------------------------------|
| Prominent (sunken) eyes                                                 |                                      |
| Narrow nose                                                             |                                      |
| Gingival recession/fragility                                            |                                      |
| Lobeless ears                                                           |                                      |
| Acrogeria                                                               |                                      |
| Easy bruising                                                           |                                      |
| Translucent skin                                                        |                                      |
| Early onset varicose veins (<30 years of age and nulliparous if female) |                                      |
| Clubfeet (one sided or bilateral)                                       |                                      |
| <b>Appearance highly suggestive for vEDS</b>                            | <b>≥5 points</b>                     |

**Supplemental Table 3. Overview of identified pathogenic and likely pathogenic COL3A1 variants**

| Location | Nucleotide change              | RNA and/or protein change              | Coding effect | Variant category     | MAF gnomAD | Pathogenic effect predicted (in silico) <sup>†</sup> | Splice site prediction | Evidence <sup>#</sup> ⊕AT <sup>~</sup> | Classification    | De novo | Ref       |
|----------|--------------------------------|----------------------------------------|---------------|----------------------|------------|------------------------------------------------------|------------------------|----------------------------------------|-------------------|---------|-----------|
|          | c.(79+1_80-1)_(447+1_448-1)del | p.(?)                                  | Frameshift    | Haploinsufficient*   | Absent     | -                                                    | -                      | PVS1 PS4 PM2(s)                        | Pathogenic        | Unknown |           |
| Exon 3   | c.318_325del                   | p.(Pro107Argfs*13)                     | Frameshift    | Haploinsufficient    | Absent     | -                                                    | -                      | PVS1 PS4 PM2(s)                        | Pathogenic        | Unknown |           |
| Intron 5 | c.528+5G>A                     | r.0<br>p.(0)                           | Splice        | Haploinsufficient*   | Absent     | -                                                    | -72.7%                 | PS4 PM2(s)<br>PP1 PP5 PP3              | Likely pathogenic | No      | (1)       |
| Exon 6   | c.548G>A                       | p.(Gly183Asp)                          | Missense      | Glycine substitution | Absent     | 3/4                                                  | -                      | PS4 PM1<br>PM2(s) PM5<br>PP2 PP3 PP5   | Pathogenic        | Unknown | (1, 4, 5) |
| Exon 6   | c.548G>T                       | p.(Gly183Val)                          | Missense      | Glycine substitution | Absent     | 3/4                                                  | -                      | PS4 PM1<br>PM2(s) PM5<br>PP2 PP3 PP5   | Pathogenic        | Unknown | (5, 52)   |
| Exon 6   | c.555del                       | p.(Gly186Valfs*36)                     | Frameshift    | Haploinsufficient    | Absent     | -                                                    | -                      | PVS1 PS4<br>PM2(s) PP5<br>PP1          | Pathogenic        | No      | (52)      |
| Exon 7   | c.619G>A                       | p.(Gly207Arg)                          | Missense      | Glycine substitution | Absent     | 4/4                                                  | -                      | PS4 PM1<br>PM2(s) PM5<br>PP2 PP3       | Pathogenic        | Unknown | (52)      |
| Exon 7   | c.628G>T                       | p.(Gly210Cys)                          | Missense      | Glycine substitution | Absent     | 4/4                                                  | -                      | PS4 PM1<br>PM2(s) PP2<br>PP3           | Likely pathogenic | Unknown |           |
| Intron 7 | c.636+5G>A                     | r.584_636+1del<br>p.(Gly195_Ser212del) | Splice        | Splice/delins/del    | Absent     | -                                                    | -64.4%                 | PS4 PM2(s)<br>PP1 PP5 PP3              | Likely pathogenic | No      | (4, 53)   |
| Exon 8   | c.654dupT                      | p.(Gly219Trpfs*17)                     | Frameshift    | Haploinsufficient    | Absent     | -                                                    | -                      | PVS1 PS4<br>PM2(s) PP1                 | Pathogenic        | No      |           |
| Exon 10  | c.753del                       | p.(Gly252Valfs*11)                     | Frameshift    | Haploinsufficient    | Absent     | -                                                    | -                      | PVS1 PS4<br>PM2(s) PP5<br>PP1          | Pathogenic        | Unknown | (52)      |
| Exon 10  | c.772G>A                       | p.(Gly258Arg)                          | Missense      | Glycine substitution | Absent     | 4/4                                                  | -                      | PS4 PM1<br>PM2(s) PM5<br>PP2 PP3       | Pathogenic        | Unknown | (5, 52)   |
| Exon 10  | c.773G>T                       | p.(Gly258Val)                          | Missense      | Glycine substitution | Absent     | 3/4                                                  | -                      | PS4 PM1<br>PM2(s) PM5<br>PM6 PP2 PP3   | Pathogenic        | Yes     | (52)      |

|           |                      |                                   |              |                      |        |     |        |                                |                   |         |      |
|-----------|----------------------|-----------------------------------|--------------|----------------------|--------|-----|--------|--------------------------------|-------------------|---------|------|
| Exon 11   | c.818G>T             | p.(Gly273Val)                     | Missense     | Glycine substitution | Absent | 3/4 | -      | PS4 PM1 PM2(s) PP2 PP3         | Likely pathogenic | Unknown |      |
| Exon 12   | c.889G>A             | p.(Gly297Arg)                     | Missense     | Glycine substitution | Absent | 4/4 | -      | PS4 PM1 PM2(s) PP2 PP3 PP5     | Pathogenic        | No      | (52) |
| Exon 13   | c.922C>T             | p.(Arg308*)                       | Nonsense     | Haploinsufficient    | Absent |     |        | PVS1 PS4 PM2(s)                | Pathogenic        | Unknown |      |
| Intron 13 | c.951+4A>G           | r.898_951del p.(Gly300_Ala317del) | Splice       | Splice/delins/del    | Absent | -   | -65.0% | PS4 PM2(s) PM6 PP5             | Likely pathogenic | Yes     | (1)  |
| Exon 14   | c.971G>A             | p.(Gly324Asp)                     | Missense     | Glycine substitution | Absent | 3/4 | -      | PS4 PM1 PM2(s) PM5 PP2 PP3     | Pathogenic        | Unknown | (52) |
| Exon 14   | c.980G>A             | p.(Gly327Asp)                     | Missense     | Glycine substitution | Absent | 3/4 | -      | PS4 PM1 PM2(s) PP1 PP2 PP3 PP5 | Pathogenic        | No      | (52) |
| Exon 15   | c.1024G>A            | p.(Gly342Arg)                     | Missense     | Glycine substitution | Absent | 4/4 | -      | PS4 PM1 PM2(s) PP2 PP3 PP5     | Pathogenic        | No      | (52) |
| Exon 15   | c.1034G>A            | p.(Gly345Glu)                     | Missense     | Glycine substitution | Absent | 3/4 | -      | PS4 PM1 PM2(s) PP1 PP2 PP3     | Pathogenic        | No      |      |
| Exon 16   | c.1088G>A            | p.(Gly363Asp)                     | Missense     | Glycine substitution | Absent | 3/4 | -      | PS4 PM1 PM2(s) PP1 PP2 PP3     | Pathogenic        | No      |      |
| Exon 17   | c.1177G>C            | p.(Gly393Arg)                     | Missense     | Glycine substitution | Absent | 4/4 | -      | PS4 PM1 PM2(s) PM6 PP2 PP3     | Pathogenic        | Yes     |      |
| Intron 18 | c.1294-2A>C          | p.(?)                             | Splice       | Splice/delins/del*   | Absent | -   | -100%  | PVS1(m) PS4 PM2(s)             | Likely pathogenic | Unknown | (1)  |
| Exon 19   | c.1330G>A            | p.(Gly444Arg)                     | Missense     | Glycine substitution | Absent | 4/4 | -      | PS4 PM1 PM2(s) PP2 PP3 PP5     | Pathogenic        | Unknown | (4)  |
| Exon 21   | c.1471C>T            | p.(Arg491*)                       | Nonsense     | Haploinsufficient    | Absent | -   | -      | PVS1 PS4 PM2(s) PP5 PP1        | Pathogenic        | No      | (54) |
| Exon 23   | c.1609-47_1662+58del | p.(Met538_Gly555del)              | In frame del | Splice/delins/del    | Absent | -   | -100%  | PVS1(m) PS4 PM2(s) PM4 PM6     | Pathogenic        | Yes     |      |

|           |             |                                        |              |                      |        |     |        |                                      |                   |         |           |
|-----------|-------------|----------------------------------------|--------------|----------------------|--------|-----|--------|--------------------------------------|-------------------|---------|-----------|
| Intron 23 | c.1662+1G>C | p.(?)                                  | In frame del | Splice/delins/del*   | Absent | -   | -100%  | PVS1(m) PS4<br>PM2(s) PM4<br>PP5     | Pathogenic        | No      | (1, 4)    |
| Exon 24   | c.1744G>A   | p.(Gly582Ser)                          | Missense     | Glycine substitution | Absent | 4/4 | -      | PS4 PM1<br>PM2(s) PP1<br>PP2 PP3 PP5 | Pathogenic        | Unknown | (1, 4, 5) |
| Exon 25   | c.1771G>C   | p.(Gly591Arg)                          | Missense     | Glycine substitution | Absent | 4/4 | -      | PS4 PM1<br>PM2(S) PM5<br>PP2 PP3     | Pathogenic        | No      | (5)       |
| Exon 27   | c.1870G>T   | p.(Gly624Trp)                          | Missense     | Glycine substitution | Absent | 4/4 | -13,8% | PS4 PM1<br>PM2(s) PP2<br>PP3         | Likely pathogenic | Unknown |           |
| Intron 28 | c.1977+1G>C | r.1924_1977del<br>p.(Gly642_Pro659del) | Splice       | Splice/delins/del    | Absent |     | -100%  | PS4, PM1,<br>PM2(s) PP3              | Likely pathogenic | No      |           |
| Exon 30   | c.2050G>A   | p.(Gly684Arg)                          | Missense     | Glycine substitution | Absent | 4/4 | -      | PS4 PM1<br>PM2(s) PP2<br>PP3 PP5     | Pathogenic        | No      | (52)      |
| Exon 30   | c.2087G>T   | p.(Gly696Val)                          | Missense     | Glycine substitution | Absent | 4/4 | -      | PS4 PM1<br>PM2(s) PM5<br>PM6 PP2 PP3 | Pathogenic        | Yes     | (5)       |
| Intron 30 | c.2121+1G>C | p.(Gly675_Lys707del) <sup>y</sup>      | Splice       | Splice/delins/del    | Absent | -   | -100%  | PVS1 PS4<br>PM2(s) PP5               | Pathogenic        | Unknown | (5)       |
| Exon 31   | c.2123G>T   | p.(Gly708Val)                          | Missense     | Glycine substitution | Absent | 4/4 | -      | PS4 PM1<br>PM2(s) PP1<br>PP2 PP3 PP5 | Pathogenic        | No      | (5)       |
| Exon 35   | c.2393G>T   | p.(Gly798Val)                          | Missense     | Glycine substitution | Absent | 4/4 | -      | PS4 PM1<br>PM2(s) PP2<br>PP3         | Likely pathogenic | Unknown |           |
| Exon 35   | c.2411G>A   | p.(Gly804Asp)                          | Missense     | Glycine substitution | Absent | 4/4 | -      | PS4 PM1<br>PM2(s) PP1<br>PP2 PP3     | Pathogenic        | No      |           |
| Intron 35 | c.2445+4A>G | p.(?)                                  | Splice       | Splice/delins/del*   | Absent | -   | -52.2% | PS4 PM2(s)<br>PM6 PP3                | Likely pathogenic | Yes     |           |
| Exon 36   | c.2491G>C   | p.(Gly831Arg)                          | Missense     | Glycine substitution | Absent | 4/4 | -      | PS4 PM1<br>PM2(s) PM6<br>PP2 PP3     | Pathogenic        | Yes     |           |
| Intron 36 | c.2553+6T>G | p.(Gly816_Ala851del)                   | Splice       | Splice/delins/del    | Absent | -   | -29.9% | PS4 PM2(s)<br>PP1 PP3                | Likely pathogenic | No      |           |

|           |                                                                |                                                |                    |                      |          |      |       |                                      |                   |         |      |
|-----------|----------------------------------------------------------------|------------------------------------------------|--------------------|----------------------|----------|------|-------|--------------------------------------|-------------------|---------|------|
| Exon 38   | c.2608-3_2609del                                               | r.[2608_2661del, 0]<br>p.[Gly870_Asn887del, 0] | Splice             | Splice/delins/del    | Absent   | -    | -100% | PS4 PM2(s)<br>PP3                    | Likely pathogenic | No      |      |
| Intron 38 | c.2662-1G>T                                                    | p.(?)                                          | Splice             | Haploinsufficient    | Absent   | -    | -100% | PVS1(m) PS4<br>PM2(s) PP1            | Likely pathogenic | No      |      |
| Exon 39   | c.2689G>A                                                      | p.(Gly897Ser)                                  | Missense           | Glycine substitution | 1/249220 | 4/4  | -     | PS4 PM1<br>PM2(s) PP1<br>PP2 PP3 PP5 | Pathogenic        | Unknown | (52) |
| Exon 39   | c.2731_2732del                                                 | p.(Thr911Trpfs*14)                             | Frameshift         | Haploinsufficient    | Absent   |      |       | PVS1 PS4<br>PM2(s)                   | Pathogenic        | No      |      |
| Exon 40   | c.2861G>C                                                      | p.(Gly954Ala)                                  | Missense           | Glycine substitution | Absent   | 4/4  |       | PS4 PM1<br>PM2(s) PM5<br>PM6 PP2 PP3 | Pathogenic        | Yes     | (5)  |
| Exon 43   | c.3157G>A                                                      | p.(Gly1053Ser)                                 | Missense           | Glycine substitution | Absent   | 4/4  |       | PS4 PM1<br>PM2(S) PM5<br>PP2 PP3     | Pathogenic        | Unknown | (5)  |
| Exon 43   | c.3181_3182delAG                                               | p.(Ser1061Trpfs*2)                             | Frameshift         | Haploinsufficient    | Absent   |      |       | PVS1 PS4<br>PM2(s) PP1               | Pathogenic        | Unknown |      |
| Exon 44   | c.3213_3221del                                                 | p.(Pro1072_Gly1074del)                         | In frame del       | Splice/delins/del    | Absent   |      |       | PS4 PM2(s)<br>PM4 PP1                | Likely pathogenic | No      |      |
| Exon 44   | c.3219_3222dup                                                 | p.(Ala1075Trpfs*20)                            | Frameshift         | Haploinsufficient    | Absent   |      |       | PVS1 PS4<br>PM2(s) PP1               | Pathogenic        | Unknown |      |
| Exon 46   | c.3391G>A                                                      | p.(Gly1131Ser)                                 | Missense           | Glycine substitution | Absent   | 4/4  | -     | PS4 PM1<br>PM2(s) PP2<br>PP3 PP5     | Pathogenic        | Unknown | (5)  |
| Exon 47   | c.3446G>A                                                      | p.(Gly1149Asp)                                 | Missense           | Glycine substitution | Absent   | 4/4  | -     | PS4 PM1<br>PM2(s) PP2<br>PP3 PP5     | Pathogenic        | No      | (1)  |
| Exon 47   | c.3512A>G                                                      | p.(Glu1171Gly)                                 | Missense           | Missense             | Absent   | 4/4  | -     | PS4 PM2(s)<br>PP2 PP3                | Likely pathogenic | No      |      |
| Exon 48   | c.3527_3528delinsAT                                            | p.(Gly1176Asp)                                 | Delins<br>In frame | Splice/delins/del    | Absent   | 3/3^ | -     | PS4 PM1<br>PM2(s) PM5<br>PP2 PP3     | Pathogenic        | Unknown | (5)  |
| Exon 48   | c.3653_3686delinsAATC                                          | p.(pro1218_Ile1229delinsGlnSer)                | Delins<br>In frame | Splice/delins/del    | Absent   | -    | -     | PS4 PM2(s)<br>PP1                    | Likely pathogenic | No      |      |
|           | arr<br>2q31.3q32.3(180,458,048-194,965,339)x1,<br>15q13.3(29,8 |                                                | CNV                | Haploinsufficient    |          |      |       | PSV1 PS4 PM6                         | Pathogenic        | Yes     |      |



|  |                      |  |  |  |  |  |  |  |  |  |  |
|--|----------------------|--|--|--|--|--|--|--|--|--|--|
|  | 06,690-30,211,011)x3 |  |  |  |  |  |  |  |  |  |  |
|--|----------------------|--|--|--|--|--|--|--|--|--|--|

NCBI Reference Sequence: NM\_000090.3, NC\_000002.12. gnomAD, Genome Aggregation Database v2.1.1; MAF, minor allele frequency; Ref, reference

<sup>†</sup>Based on MutationTaster, PolyPhen2, SIFT, align GVG D

# PVS1: Probability of loss of function intolerance (pLI) score for COL3A1 is 1.0; loss of function observed/expected upper bound fraction (LOEUF) score for COL3A1 is 0.098. PVS1 is used as a moderate argument if RNA sequencing was not performed.

<sup>Δ</sup> PS4 is given after calculating Bayesian OR according to the recommendation of Kyung Cho et al <sup>55</sup>. Odds ratio are > 5.0 and confidence interval does not include 1.0.

<sup>⊖</sup> PM1 Variant occurs in the triple helical domain and replaces the glycine in the canonical Gly-X-Y repeat; missense substitution of a canonical glycine residue is expected to disrupt normal protein folding and function, and this is an established mechanism of disease

<sup>†</sup> PM2 is used as a supportive argument according to the latest recommendations; ClinGen Sequence Variant Interpretation Recommendation for PM2 - Version 1.0

<sup>∇</sup> Specification of PP2; The missense constraint score (Z score  $\geq 3.09$ ) from gnomAD is used <sup>56,57</sup>. Z-score for COL3A1 is 4.09 (<https://gnomad.broadinstitute.org>), the missense variants are spread over all exons.

<sup>~</sup> PP5 is given when a variant is previously described as P/LP in literature or in ClinVar.

\*Suspected based on prediction models in Alamut.

<sup>∇</sup> Based on described protein change by Pepin et al. <sup>5</sup>.

<sup>^</sup> MutationTaster not applicable

**Supplemental Table 4. Specification thoracic aortic aneurysms**

| Patient                                                            | Sex    | Mutation                        | Age at diagnosis (years) | Diameter thoracic aortic aneurysm (mm) | Imaging modality | Elective aortic surgery                                      |
|--------------------------------------------------------------------|--------|---------------------------------|--------------------------|----------------------------------------|------------------|--------------------------------------------------------------|
| <b>Ascending aortic aneurysm (n=10)</b>                            |        |                                 |                          |                                        |                  |                                                              |
| 1                                                                  | Male   | p.(Gly252Valfs*11)              | 55                       | 41                                     | MRA              | -                                                            |
| 2                                                                  | Male   | p.(Gly342Arg)                   | 63                       | 45                                     | Echocardiography | -                                                            |
| 3                                                                  | Female | c.(79+1_80-1)_(447+1_448-1)del. | 56                       | 53                                     | n.a.             | PEARS                                                        |
| 4                                                                  | Male   | p.(Gly1149Asp)                  | 41                       | 47                                     | CTA              | Ascending aortic replacement (unspecified)                   |
| 5                                                                  | Female | p.(Gly1149Asp)                  | 70                       | 46                                     | CTA              | Ascending aortic replacement (unspecified)                   |
| 6                                                                  | Female | p.(Gly345Glu)                   | 72                       | 41                                     | CTA              | -                                                            |
| 7                                                                  | Male   | p.(Gly393Arg)                   | 69                       | 41                                     | CTA              | -                                                            |
| 8                                                                  | Male   | p.(Gly345Glu)                   | 55                       | 52                                     | CTA              | AVR + ascending aorta replacement                            |
| 9                                                                  | Male   | p.(Ser1061Trpfs*2)              | 62                       | 53                                     | CTA              | AVR + ascending aorta + partial arch replacement             |
| 10                                                                 | Male   | p.(Gly186Valfs*36)              | 46                       | 47                                     | CTA              | -                                                            |
| <b>Ascending aortic aneurysm + abdominal aortic aneurysm (n=3)</b> |        |                                 |                          |                                        |                  |                                                              |
| 11                                                                 | Female | p.(Gly345Glu)                   | 61                       | 46                                     | MRA              | AVR + ascending aorta replacement + iliac endovascular stent |
| 12                                                                 | Male   | p.(Thr911Trpfs*14)              | 53                       | 48                                     | CTA              | -                                                            |
| 13                                                                 | Female | p.(Gly219fs)                    | 55                       | 40                                     | MRA              | -                                                            |
| <b>Sinus of Valva aneurysm (n=2)</b>                               |        |                                 |                          |                                        |                  |                                                              |
| 14                                                                 | Male   | p.(Gly798Val)                   | 36                       | 42                                     | CTA              | -                                                            |
| 15                                                                 | Male   | p.(Gly345Glu)                   | 33                       | 41                                     | MRA              | -                                                            |
| <b>Aortic arch aneurysm (n=3)</b>                                  |        |                                 |                          |                                        |                  |                                                              |
| 16                                                                 | Male   | p.(Gly393Arg)                   | 43                       | 40                                     | CTA              | -                                                            |
| 17                                                                 | Male   | p.(Gly363Asp)                   | 41                       | 56                                     | CTA              | Ascending aorta + (partial) arch replacement                 |
| 18                                                                 | Male   | p.(Gly327Asp)                   | 69                       | 40                                     | MRA              | -                                                            |

MRA, Magnetic resonance angiography; PEARS, personalized external aortic root support; CTA, computed tomography angiography; AVR, aortic valve replacement; n.a., not applicable

**Supplemental Table 5. Vascular interventions**

| <i>Thoracic aorta</i>                                        |                                        |                                 |                                |
|--------------------------------------------------------------|----------------------------------------|---------------------------------|--------------------------------|
|                                                              | <b>Elective aneurysm repair (n=16)</b> | <b>Type A dissection (n= 8)</b> | <b>Type B dissection (n=5)</b> |
| <b>Operation performed (% of total)</b>                      | 8 (50%)                                | 6 (75%)                         | 1 (20%)                        |
| <b>Diameters in mm (if known)</b>                            | 46, 46, 47, 52, 53, 56                 |                                 |                                |
| <b>Type of intervention (n)</b>                              |                                        |                                 |                                |
| Ascending aortic replacement (unspecified)                   | 2                                      | 1                               |                                |
| Ascending aorta + (partial) arch replacement                 | 1                                      | 3                               |                                |
| AVR + ascending aorta replacement                            | 2                                      | 2                               |                                |
| AVR + ascending aorta + partial arch replacement             | 1                                      |                                 |                                |
| PEARS                                                        | 1                                      |                                 |                                |
| Descending aorta replacement                                 | 1                                      |                                 |                                |
| TEVAR                                                        |                                        |                                 | 1                              |
| <b>Severe complication</b>                                   |                                        |                                 |                                |
| Sternum infection                                            |                                        | 1                               |                                |
| <i>Abdominal aorta</i>                                       |                                        |                                 |                                |
|                                                              | <b>Elective aneurysm repair (n=16)</b> | <b>Rupture AAA (n=1)</b>        | <b>Dissection (n=10)</b>       |
| <b>Operation performed (% of total)</b>                      | 6 (37.5%)                              | 1 (100%)                        | 5 (50%)                        |
| <b>Diameters in mm (if known)</b>                            | 30, 57, 64, 88                         |                                 |                                |
| <b>Type of intervention (n)</b>                              |                                        |                                 |                                |
| (F)EVAR procedure                                            | 3                                      |                                 |                                |
| Aortic bifurcation prosthesis                                | 2                                      | 1                               | 1                              |
| Aorto-bi-iliac bypass                                        | 1                                      |                                 |                                |
| Coiling                                                      |                                        |                                 |                                |
| Stenting                                                     |                                        |                                 | 4                              |
| <b>Severe complications</b>                                  |                                        |                                 |                                |
| Platzbauch and enterocutaneous fistulas                      |                                        |                                 | 1                              |
| Type 3 endoleak, resulting in ruptured AAA (see next column) | 1                                      |                                 |                                |
| Serosa defect leading to ileocecal resection                 |                                        | 1                               |                                |
| <i>Middle sized arteries</i>                                 |                                        |                                 |                                |
|                                                              | <b>Aneurysm (n=18)</b>                 | <b>Dissection (n=19)</b>        | <b>CCSF (n=2)</b>              |
| <b>Operation performed (% of total)</b>                      | 11 (50%)                               | 5 (52.6%)                       | 2 (100%)                       |
| <b>Type of intervention (n)</b>                              |                                        |                                 |                                |
| Coiling                                                      | 5                                      |                                 | 2                              |
| Stenting                                                     | 3                                      | 4                               |                                |
| Ligation                                                     | 1                                      |                                 |                                |
| Graft                                                        |                                        | 1                               |                                |
| Unknown                                                      | 2                                      |                                 |                                |
| <b>Severe complication</b>                                   |                                        |                                 |                                |
| Rupture after coiling                                        |                                        | 1                               |                                |

AVR, aortic valve replacement; PEARS, personalized external aortic root support; TEVAR, thoracic endovascular aortic repair; (F)EVAR, (fenestrated) endovascular aortic repair; AAA, abdominal aortic aneurysm; CCSF, carotid-cavernous sinus fistula
